# Supplementary material
Source: ML conference proceedings conference paper supplement (https://proceedings.neurips.cc/paper_files/paper/2010/hash/6f3e29a35278d71c7f65495871231324-Abstract.html)
Supplement: Supplementary file 2 [file supplemental_images.pdf › supplemental_images.pdf]

---

# Supplemental images for Regularized estimation of image statistics by Score Matching

---

**Diederik P. Kingma**

Department of Information and Computing Sciences  
Universiteit Utrecht  
`d.p.kingma@students.uu.nl`

**Yann LeCun**

Courant Institute of Mathematical Sciences  
New York University  
`yann@cs.nyu.edu`

## 1 Denoised images

For illustrative purposes, the original, noisy and denoised images of a detail of the Lena image are shown below. It can be seen that when our model is applied to denoising, the image is not over-smoothed (like with CD-1) or under-smoothed (like with Basis Rotation).

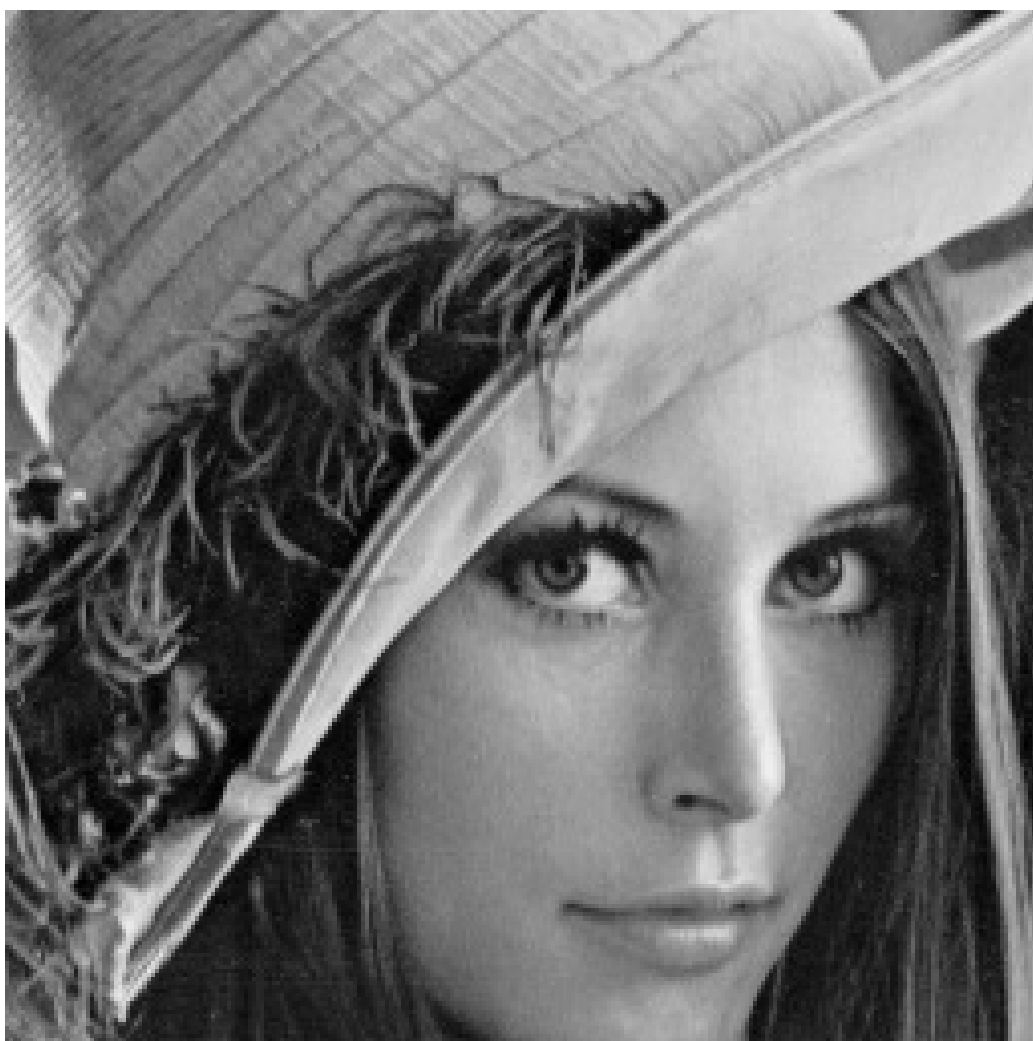

Figure 1: Center of original Lena image

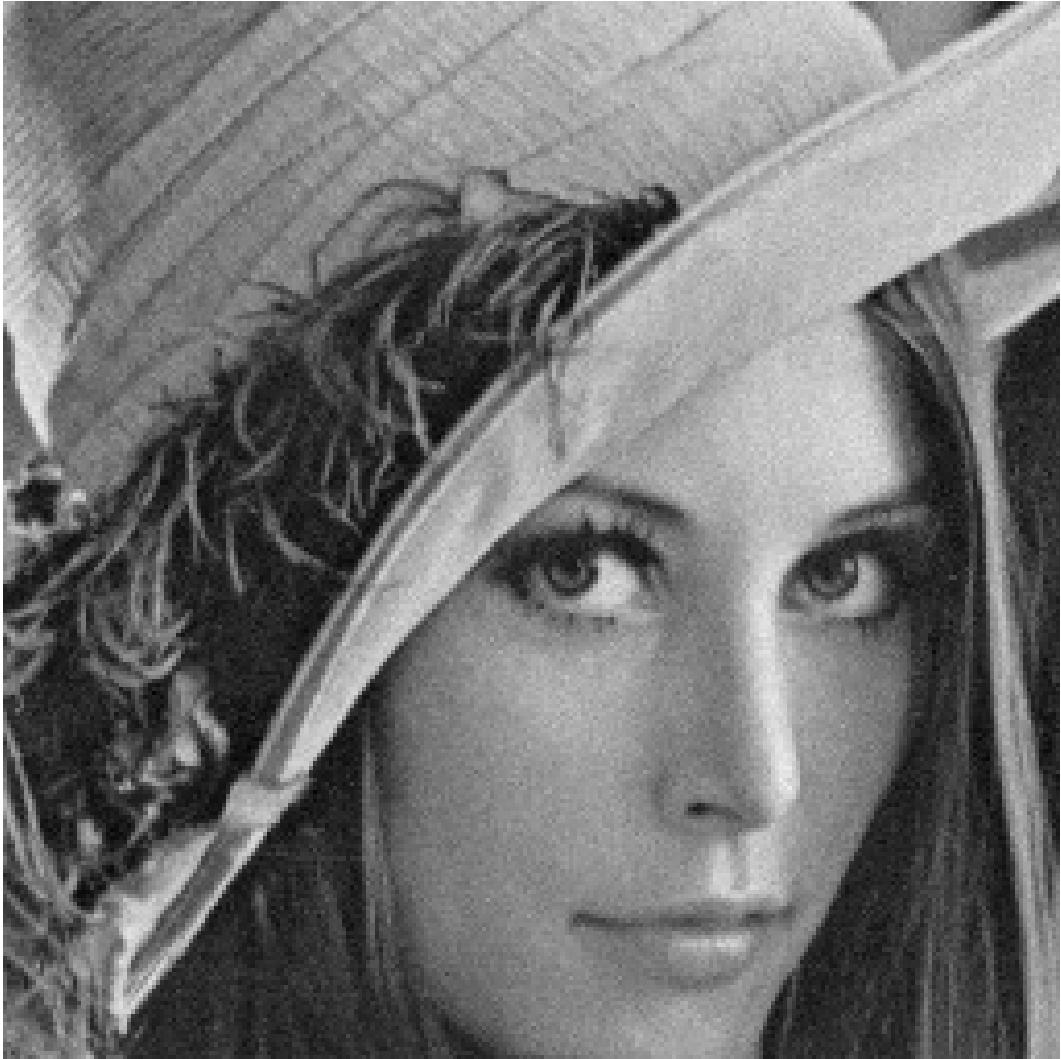

Figure 2: Image with some Gaussian noise added ( $\sigma_{noise} = 5/256$ ).

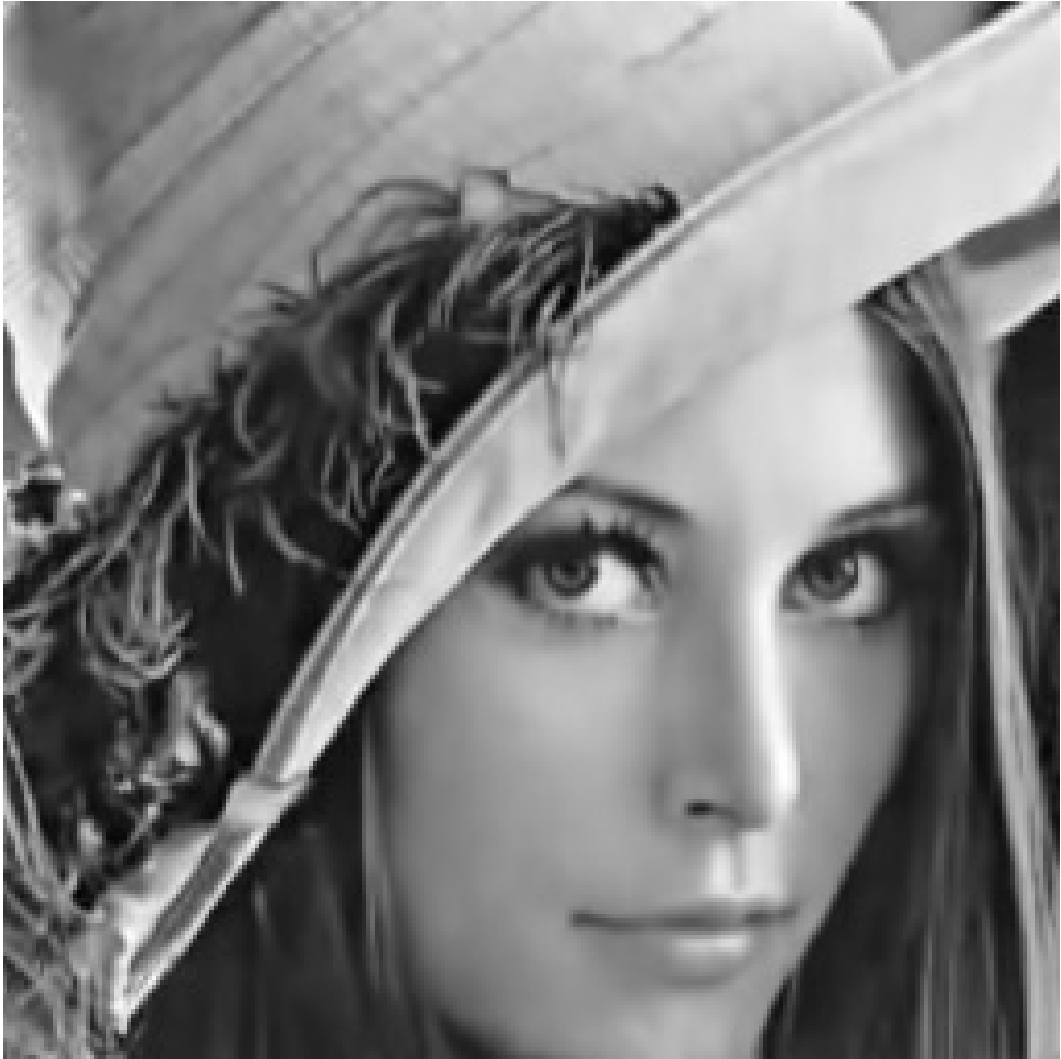

Figure 3: Denoised with Roth et al model (CD-1).

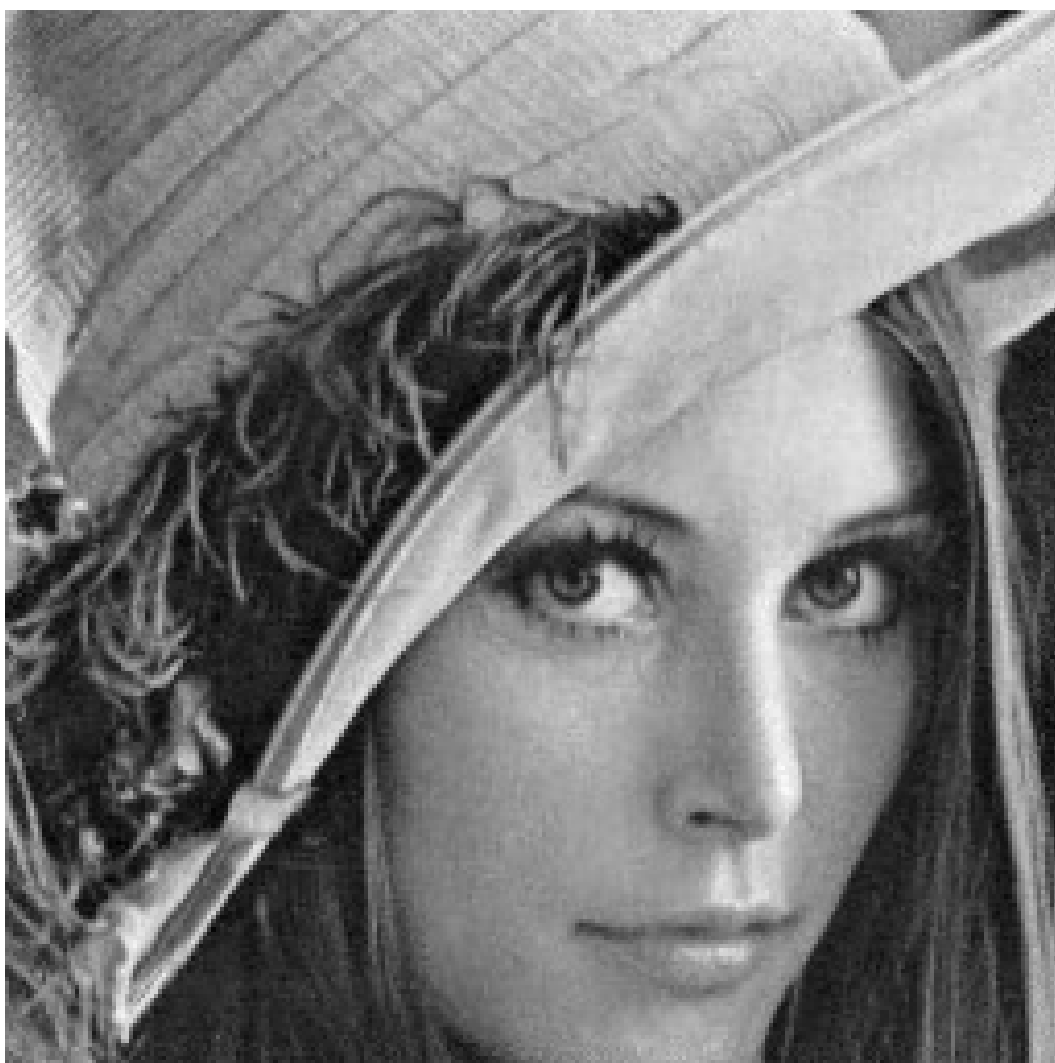

Figure 4: Denoised with the Basis Rotation model.

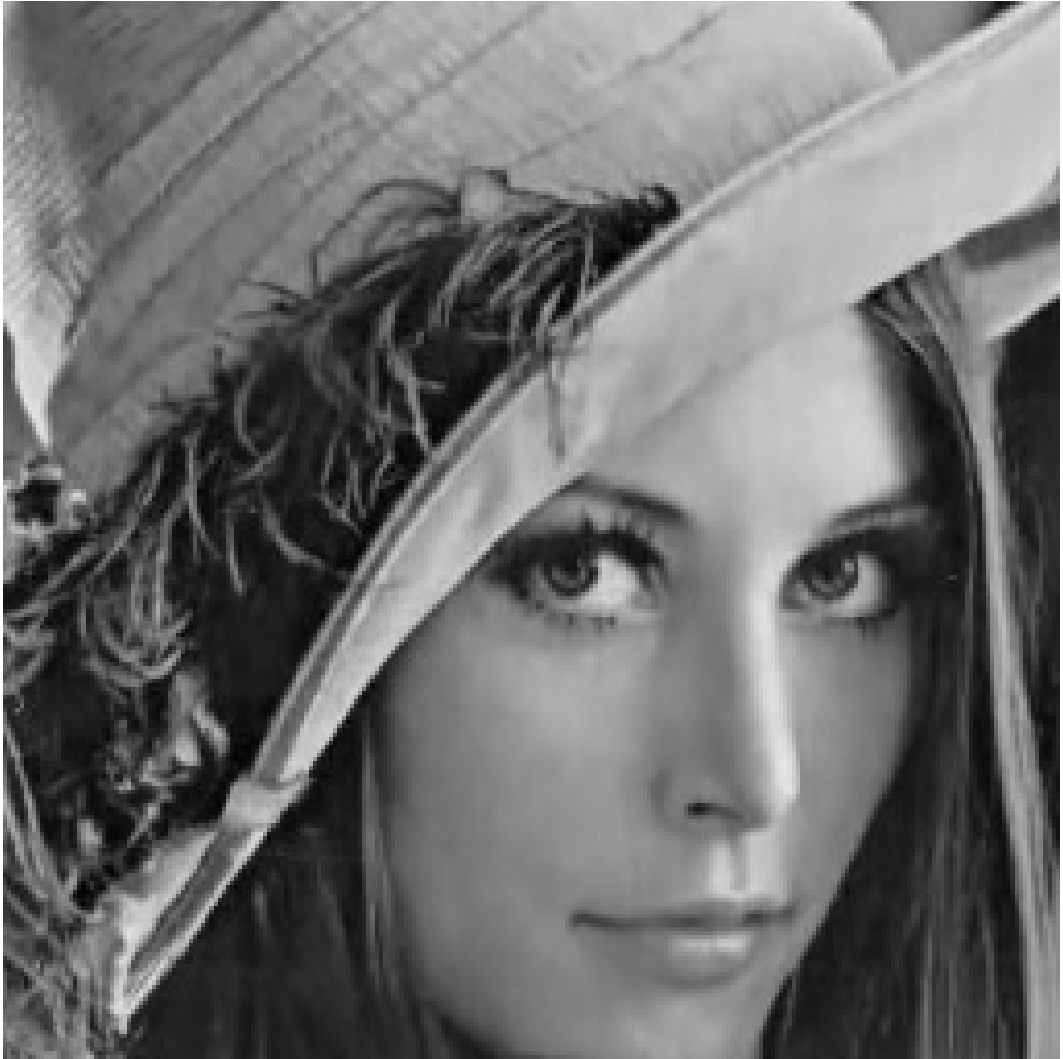

Figure 5: Denoised with our model (regularized Score Matching).
